# Supplementary material for: Secondary Metabolites in Basil, Bio-Insecticide, Inhibition Effect, and In Silico Molecular Docking against Proteolytic Enzymes of the Red Palm Weevil (Rhynchophorus ferrugineus)
Source: MDPI journal article supplement (doi:10.3390/plants11081087), 2022-04-16
Supplement: s1 [file s1]

## Supplementary materials

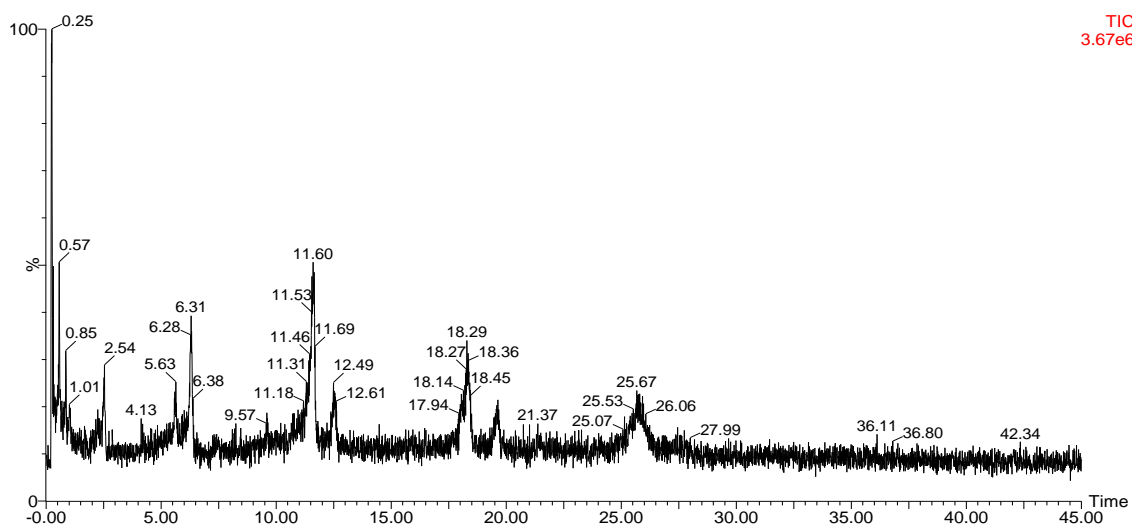

Figure S1. LC-MS Chromatogram of *O. basilicum* cell suspension extracts.

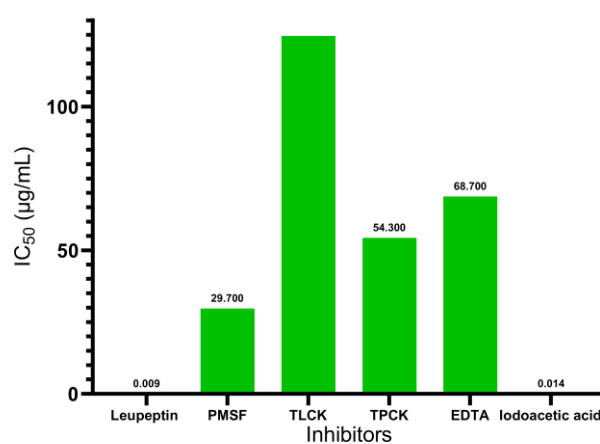

Figure S2. In vitro specific inhibitors against protease enzymes in *R. ferrugineus* larval instars; Leupeptin: general proteinase Inhibitor; PMSF: a general inhibitor of serine proteinase (Elastase); TLCK: Trypsin inhibitor; TPCK: chymotrypsin inhibitor; EDTA: metalloprotease inhibitor; Iodoacetic acid: cysteine protease inhibitor.

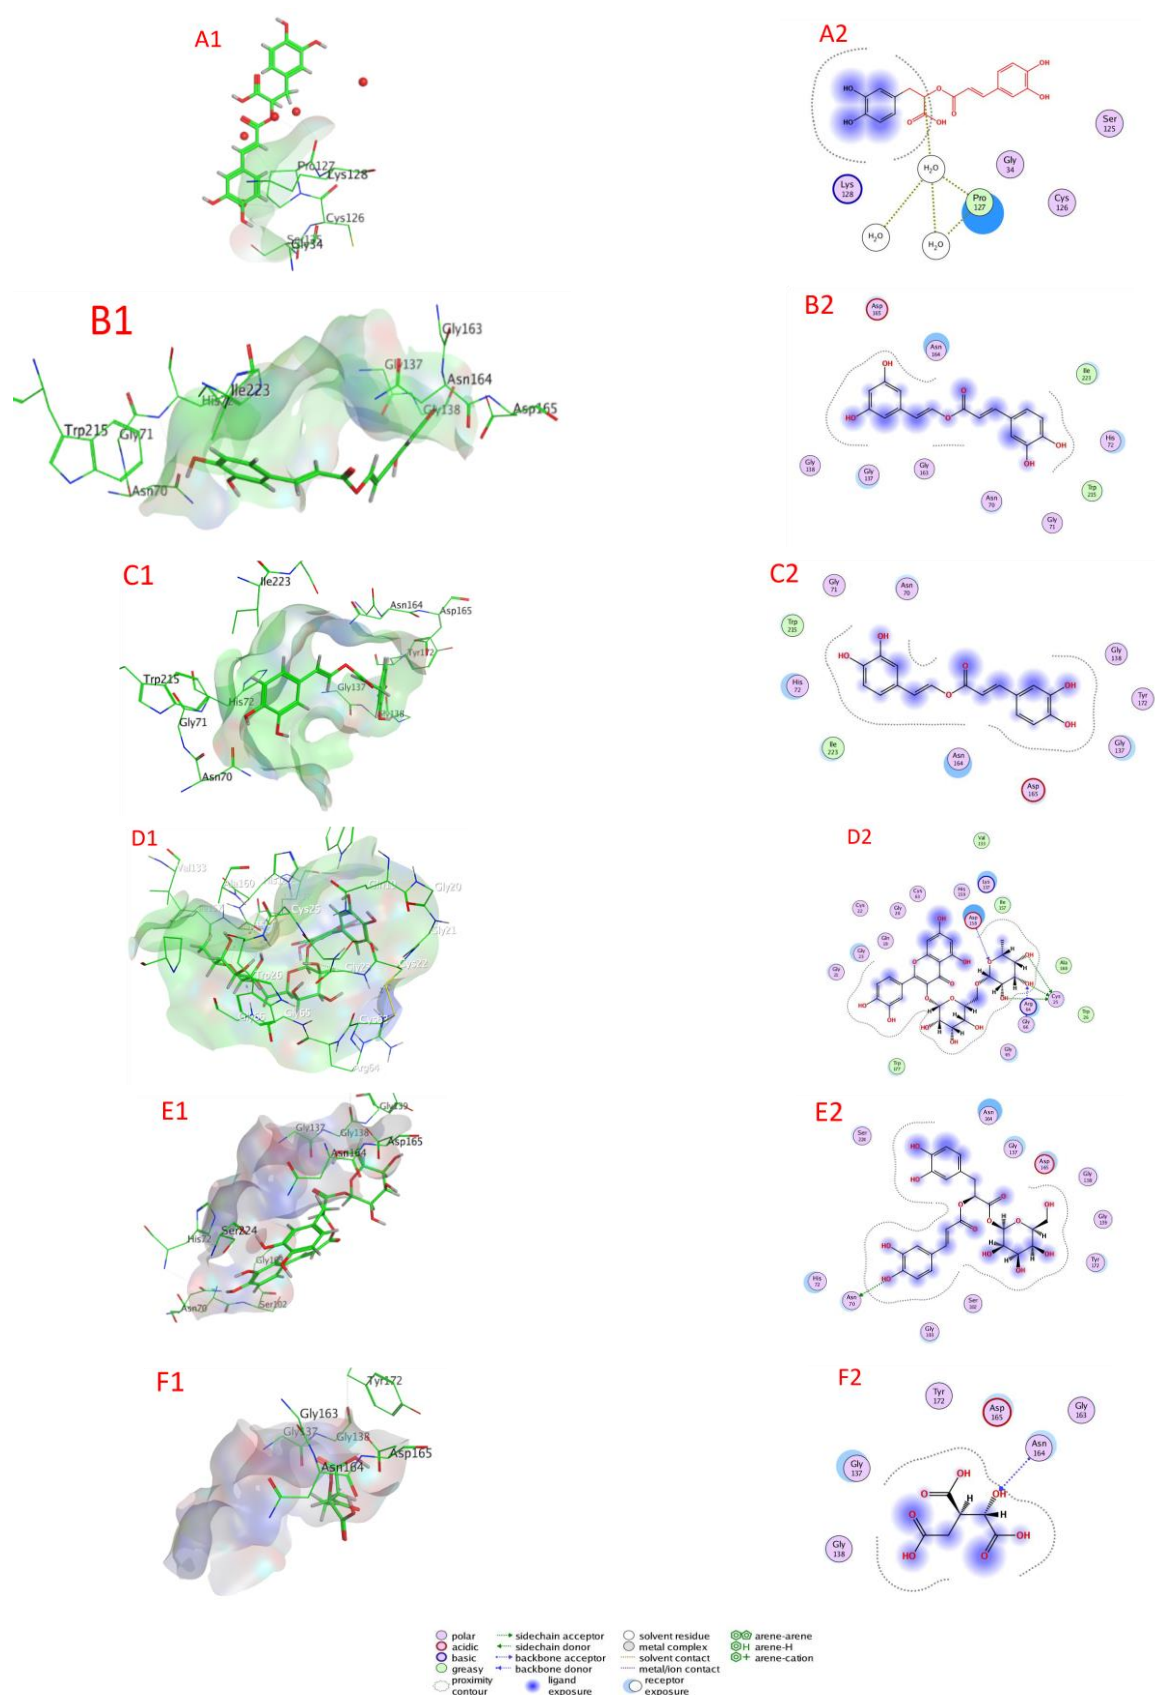

**Figure S3.** Docking and ligand Interactions of rosmarinic acid (A1, A2), nepetoidin A (B1, B2), nepetoidin B (C1, C2), quercetin-3-O-rutinoside (D1, D2), rosmarinyl glucoside (E1, E2), and isocitric acid (F1, F2) within the active sites of serine proteinase (PDB:2F7O).

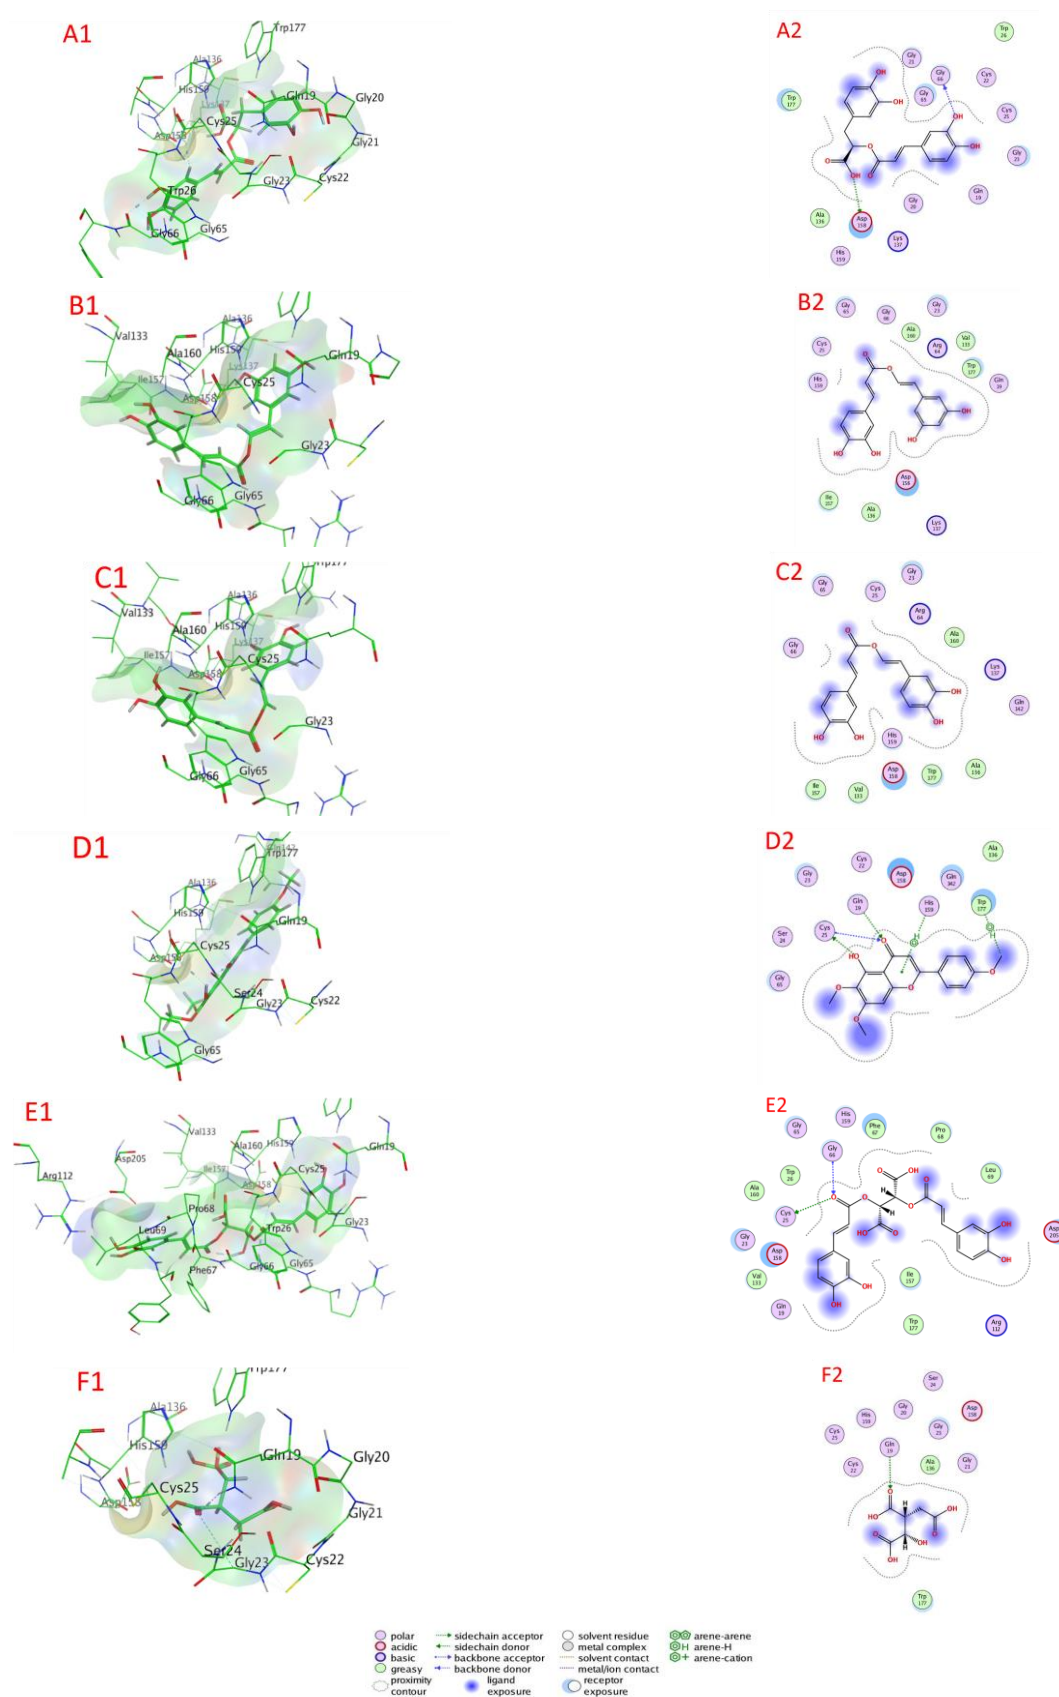

**Figure S4.** Docking and ligand Interactions of rosmarinic acid (A1, A2), nepetoidin A (B1, B2), nepetoidin B (C1, C2), salvigenin (D1, D2), chicoric acid (E1, E2), and isocitric acid (F1, F2) within the active sites of cysteine proteinase (PDB:3IOQ).

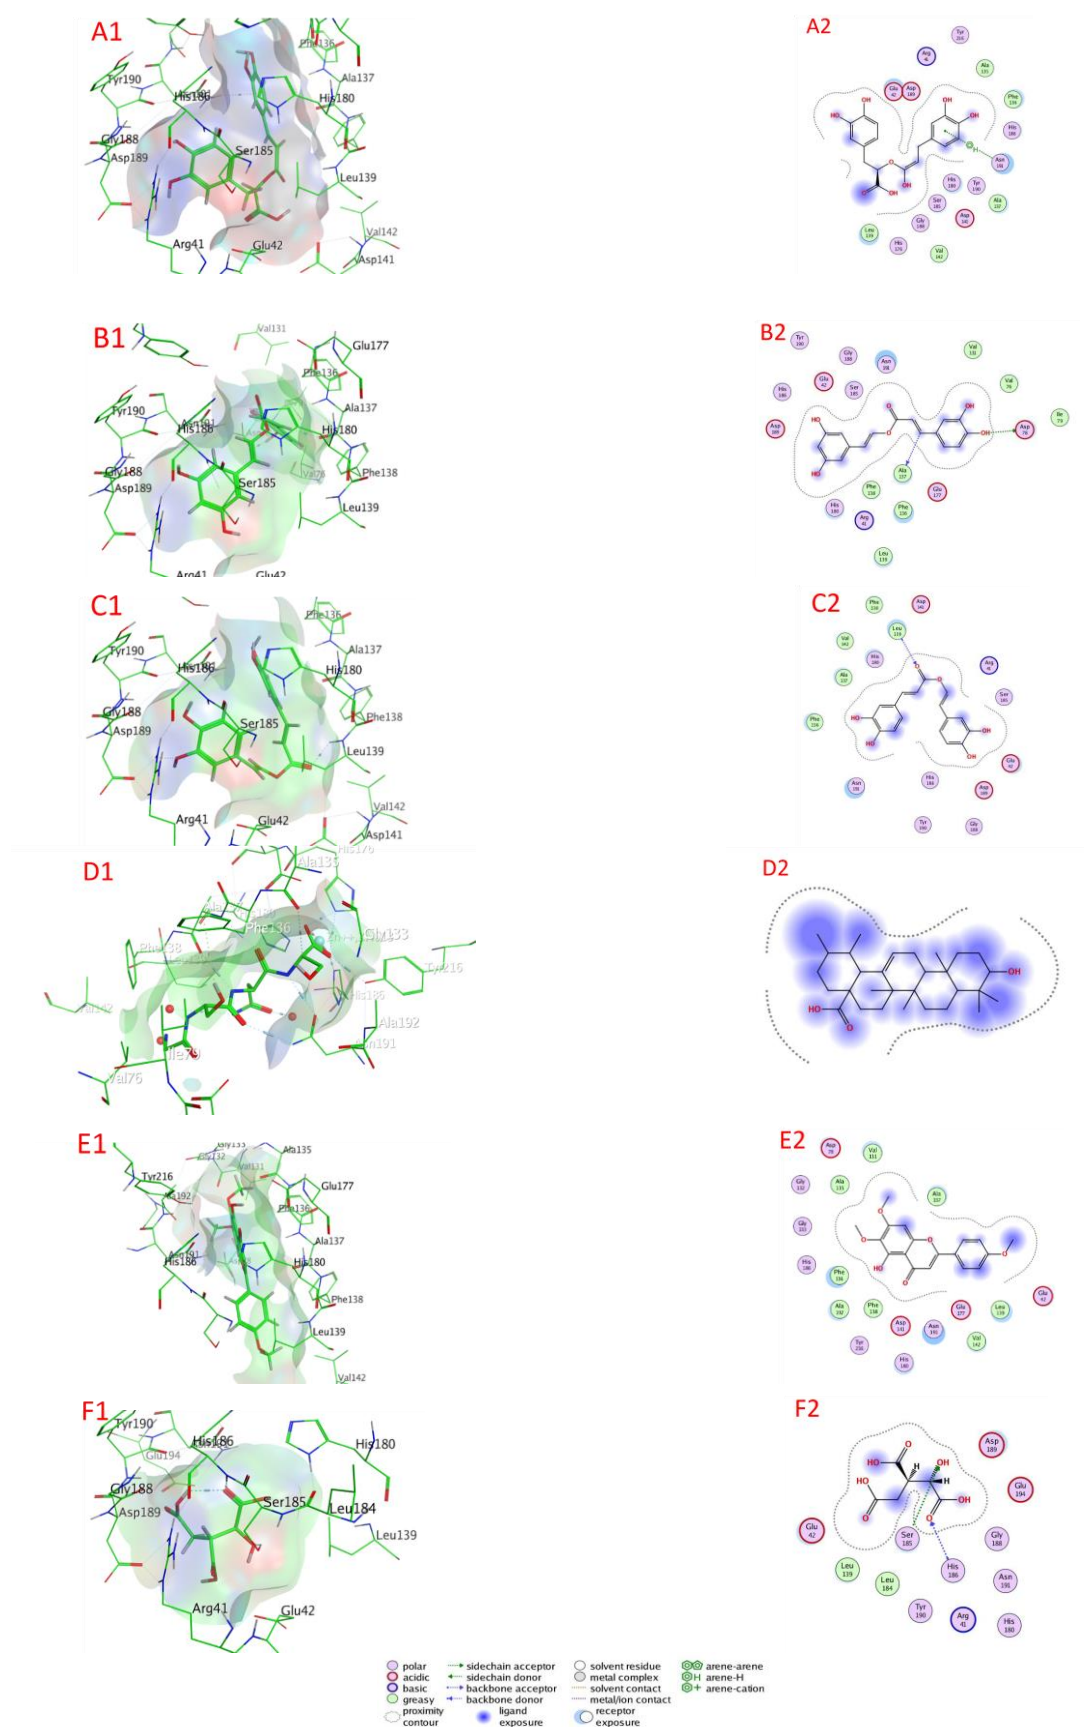

**Figure S5.** Docking and ligand Interactions of rosmarinic acid (A1, A2), nepetoidin A (B1, B2), nepetoidin B (C1, C2), ursolic acid (D1, D2), salvigenin (E1, E2), and isocitric acid (F1, F2) within the active sites of metalloproteinase (PDB:1KAP).

**Table S1.** ADMET analysis of rosmarinic acid, nepetoidin A, nepetoidin B, ursolic acid, salvigenin, quercetin-3-O-rutinoside, rosmarinyl glucoside, isocitric acid and chicoric acid.

| Compounds                 | HBD | HBA | LogP   | LogS<br>( $\mu\text{g/mL}$ ) | BBB | PPB | CYP450 2D6<br>substrate | H-HT | TPSA   |
|---------------------------|-----|-----|--------|------------------------------|-----|-----|-------------------------|------|--------|
| rosmarinic acid           | 5   | 7   | 1.761  | 96.535                       | ++  | +   | +                       | +    | 144.52 |
| Nepetoidin A              | 4   | 5   | 2.736  | 47.026                       | -   | +   | -                       | +    | 107.22 |
| Nepetoidin B              | 4   | 6   | 2.736  | 47.026                       | -   | +   | -                       | +    | 107.22 |
| Ursolic acid              | 2   | 2   | 7.09   | 0.187                        | ++  | +   | -                       | ---  | 57.53  |
| Salvigenin                | 1   | 6   | 3.191  | 44.905                       | +   | +   | ++                      | ++   | 78.13  |
| Rosmarinic acid glucoside | 8   | 13  | -0.98  | 473.208                      | --- | +   | +                       | -    | 223.67 |
| Quercetin-3-O-rutinoside  | 10  | 16  | -1.687 | 315.283                      | --- | +   | ---                     | ---  | 269.43 |
| chicoric acid             | 6   | 10  | 1.228  | 97.526                       | +   | +   | -                       | -    | 208.12 |
| Isocitric acid            | 4   | 7   | -1.393 | 42518                        | +++ | +   | -                       | -    | 132.13 |

HBA: hydrogen bond acceptor; HBD: hydrogen bond donor; LogS: Solubility; LogP: Distribution Coefficient P; PPB: Plasma Protein Binding; BBB: Blood–Brain Barrier; H-HT: Human Hepatotoxicity. LogS: Optimal: higher than -4 log mol/L, LogS <10  $\mu\text{g/mL}$ : Low solubility; LogS 10–60  $\mu\text{g/mL}$ : Moderate solubility; LogS >60  $\mu\text{g/mL}$ : High solubility; LogP: Optimal:  $0 < \text{LogP} < 3$ ,  $\text{LogP} < 0$ : poor lipid bilayer permeability,  $\text{LogP} > 3$ : poor aqueous solubility; BBB: BB ratio  $\geq 0.1$ : BBB+; BB ratio <0.1: BBB-; classification of models & probability 0~0.1 (---), 0.1~0.3 (--), 0.3~0.5 (-), 0.5~0.7 (+), 0.7~0.9 (++), 0.9~1 (+++).
